# Supplementary material for: High-density integration of carbon nanotubes via chemical self-assembly
Source: Springer Nature journal article supplement (doi:10.1038/nnano.2012.189), 2012-10-28
Supplement: nnano.2012.189-s1.pdf [file nnano.2012.189-s1.pdf]

Browse Articles
| Nature Nanotechnology


Skip to main content

Thank you for visiting nature.com. You are using a browser version with limited support for CSS. To obtain
the best experience, we recommend you use a more up to date browser (or turn off compatibility mode in
Internet Explorer). In the meantime, to ensure continued support, we are displaying the site without styles
and JavaScript.

Advertisement


- View all journals
- Search
- Log in

- Explore content
- About the journal
- Publish with us

- Sign up for alerts
- RSS feed


1. nature
2. nature nanotechnology
3. browse articles

# Browse Articles

## Filter By:

Article Type

All

- All
- Article (1139)
- Author Correction (46)
- Comment (49)
- Commentary (70)
- Correction (22)
- Correspondence (75)
- Corrigendum (25)
- Editorial (200)
- Erratum (17)
- Feature (39)
- In the Classroom (50)
- Letter (1032)
- News & Views (924)
- Perspective (42)
- Publisher Correction (40)
- Research Briefing (28)
- Research Highlight (84)
- Research Highlights (1170)
- Review Article (145)
- Thesis (102)

Year

All

- All
- 2024 (86)
- 2023 (275)
- 2022 (241)
- 2021 (226)
- 2020 (218)
- 2019 (265)
- 2018 (303)
- 2017 (292)
- 2016 (303)
- 2015 (324)
- 2014 (323)
- 2013 (295)
- 2012 (251)
- 2011 (251)
- 2010 (280)
- 2009 (414)
- 2008 (387)
- 2007 (455)
- 2006 (180)

- ### Nanoscale doping of polymeric semiconductors with confined electrochemical ion implantation

  A simple manipulation of an electrolyte’s glass transition enables nanoresolved electrochemical ion implantation doping in a variety of polymeric semiconductors.

  - Lanyi Xiang
  - Zihan He
  - Daoben Zhu

  Article22 Apr 2024
- ### Nanosurface-reconstructed perovskite for highly efficient and stable active-matrix light-emitting diode display

  Acid-etching-driven nanosurface reconstruction of perovskite quantum-dot pure-red LEDs facilitates a peak external quantum efficiency of 28.5% and a half-lifetime of 30 h at 100 cd m−2 luminance, enabling highly efficient solution-processed active-matrix perovskite displays.

  - Hongjin Li
  - Yifeng Feng
  - Zhizhen Ye

  Article22 Apr 2024
- ### Upconversion electroluminescence in 2D semiconductors integrated with plasmonic tunnel junctions

  Plasmonic tunnel junctions integrated with a monolayer semiconductor are found to emit photons with energies exceeding the input electrical potential. This peculiar phenomenon is ascribed to being triggered by inelastic electron tunnelling dipoles inducing optically forbidden transitions in the carrier injection electrode.

  - Zhe Wang
  - Vijith Kalathingal
  - Goki Eda

  Article19 Apr 2024
- ### Nanoparticles subdue antibiotic-resistant bacteria’s defences while enhancing innate immunity

  A method for overcoming antibiotic resistance uses multimodal nanoparticles that target bacterial defence mechanisms while enhancing the innate immune response.

  - Julia C. Lang
  - Keira Melican

  News & Views17 Apr 2024
- ### Multimodal nanoimmunotherapy engages neutrophils to eliminate *Staphylococcus aureus* infections

  Antimicrobial resistance is becoming more prevalent. Here the authors use multimodal nanoparticles to modulate the infected microenvironment, recruit neutrophils and alleviate hypoxia to restore neutrophil function, demonstrating therapeutic efficacy against MRSA infections in mice.

  - Jingcheng Zhu
  - Ruosen Xie
  - Shaoqin Gong

  Article17 Apr 2024
- ### Giant nanomechanical energy storage capacity in twisted single-walled carbon nanotube ropes

  A single-walled carbon nanotube spring stores three times more mechanical energy than a lithium-ion battery, while offering wide temperature stability and posing no explosion risk.

  - Shigenori Utsumi
  - Sanjeev Kumar Ujjain
  - Katsumi Kaneko

  ArticleOpen Access16 Apr 2024
- ### Acute, controlled inhalation of thin graphene oxide nanosheets in humans with null cardiorespiratory effects

  A double-blind, randomized, controlled human exposure trial of highly purified and thin nanometre-sized graphene oxide nanosheets shows that acute inhalation of aerosolized nanoparticles is not associated with harmful effects in healthy humans.

  - Ulla Vogel

  News & Views08 Apr 2024
- ### De novo design of pH-responsive self-assembling helical protein filaments

  Engineering the tunability of protein assembly in response to pH changes within a narrow range is challenging. Here the authors report the de novo computational design of pH-responsive protein filaments that exhibit rapid, precise, tunable and reversible assembly and disassembly triggered by small pH changes.

  - Hao Shen
  - Eric M. Lynch
  - David Baker

  ArticleOpen Access03 Apr 2024
- ### Roeland Nolte (1944–2024)

  - Pall Thordarson
  - E. W. Meijer

  Obituary01 Apr 2024
- ### Light manipulation with sub-pixel wavefront control using gap phases

  How can light be efficiently manipulated below the single-pixel level? An answer is now provided using near-field interactions for nanopillars in a metasurface — phase gradients in the gaps between the nanopillars constitute a new degree of freedom that enables efficient wavefront control at the nanoscale.

  Research Briefing01 Apr 2024
- ### Highly efficient vortex generation at the nanoscale

  A metasurface consisting of merely four nanopillars at the wavelength scale is sufficient to generate a high-quality vortex beam.

  - Qinmiao Chen
  - Geyang Qu
  - Shumin Xiao

  Article01 Apr 2024
- ### Artificial intelligence assists the synthesis of all-natural plastic substitutes

  Robotics and machine learning are combined to predict and prepare a variety of nanocomposite materials with properties mimicking those of various types of plastics, starting from natural building blocks.

  - Zhaoming Liu

  News & Views28 Mar 2024
- ### Controlling the STING pathway to improve immunotherapy

  A genetically engineered variant of the stimulator of interferon genes (STING) protein is delivered to cancer cells, showing potential for clinical impact.

  - John T. Wilson

  News & Views25 Mar 2024
- ### Topographic fingerprinting of single proteins and proteoforms

  A distance-based mapping strategy using single-molecule fluorescence resonance energy transfer via DNA eXchange (FRET X) enables full-length fingerprinting of intact protein sequences.

  - J. Carlos Penedo

  News & Views25 Mar 2024
- ### Graphene edge interference improves single-molecule transistors

  The performance of three-terminal molecular transistors is enhanced through the harnessing of quantum interference in the edges of graphene electrodes.

  - Héctor Vázquez

  News & Views25 Mar 2024
- ### Quantum interference enhances the performance of single-molecule transistors

  An experimental demonstration of how destructive quantum interference effects can increase the performance of single-molecule field-effect transistors to reach levels similar to those of nanoelectronic transistors.

  - Zhixin Chen
  - Iain M. Grace
  - James O. Thomas

  ArticleOpen Access25 Mar 2024
- ### Engineering colloidal semiconductor nanocrystals for quantum information processing

  This Review highlights the current potential for colloidal quantum dots for applications in quantum sensing and quantum circuits.

  - Jawaher Almutlaq
  - Yuan Liu
  - Edward H. Sargent

  Review Article21 Mar 2024
- ### Engineering interfacial polarization switching in van der Waals multilayers

  Operando transmission electron microscopy imaging reveals that modifying interlayer rotations alters both the spatial arrangement and switching dynamics of polar domains in artificially stacked trilayers of WSe2.

  - Madeline Van Winkle
  - Nikita Dowlatshahi
  - D. Kwabena Bediako

  Article19 Mar 2024
- ### Genome-wide forward genetic screening to identify receptors and proteins mediating nanoparticle uptake and intracellular processing

  Understanding how cells process nanoparticles is crucial to improve nanomedicine efficacy. Here a genome-wide screening is used to discover proteins that are involved in silica nanoparticle accumulation by cells and shows that different apolipoprotein receptors and proteoglycans mediate their internalization.

  - Daphne Montizaan
  - Roberta Bartucci
  - Anna Salvati

  Article19 Mar 2024
- ### Author Correction: 3D nanofabricated soft microrobots with super-compliant picoforce springs as onboard sensors and actuators

  - Haifeng Xu
  - Song Wu
  - Oliver G. Schmidt

  Author CorrectionOpen Access18 Mar 2024

- Previous page
- page 1
- page 2
- page 3
- …
- page 269
- Next page

## Explore content

- Research articles
- Reviews & Analysis
- News & Comment
- Videos
- Current issue
- Collections

- Follow us on Twitter
- Sign up for alerts
- RSS feed


## About the journal

- Aims & Scope
- Journal Information
- Journal Metrics
- About the Editors
- Advisory Panel
- Our publishing models
- Editorial Values Statement
- Editorial Policies
- Content Types
- Web Feeds
- Contact
- Research Cross-Journal Editorial Team
- Reviews Cross-Journal Editorial Team


## Publish with us

- Submission Guidelines
- For Reviewers
- Language editing services
- Submit manuscript

## Search

Search articles by subject, keyword or author

Show results from

All journals
This journal

Search

Advanced search

### Quick links

- Explore articles by subject
- Find a job
- Guide to authors
- Editorial policies

Nature Nanotechnology (*Nat. Nanotechnol.*)

ISSN 1748-3395 (online)

ISSN 1748-3387 (print)

## nature.com sitemap

### About Nature Portfolio

- About us
- Press releases
- Press office
- Contact us

### Discover content

- Journals A-Z
- Articles by subject
- protocols.io
- Nature Index

### Publishing policies

- Nature portfolio policies
- Open access

### Author & Researcher services

- Reprints & permissions
- Research data
- Language editing
- Scientific editing
- Nature Masterclasses
- Research Solutions

### Libraries & institutions

- Librarian service & tools
- Librarian portal
- Open research
- Recommend to library

### Advertising & partnerships

- Advertising
- Partnerships & Services
- Media kits
- Branded
  content

### Professional development

- Nature Careers
- Nature 
  Conferences

### Regional websites

- Nature Africa
- Nature China
- Nature India
- Nature Italy
- Nature Japan
- Nature Middle East

- Privacy
  Policy
- Use
  of cookies
- Your privacy choices/Manage cookies
- Legal
  notice
- Accessibility
  statement
- Terms & Conditions
- Your US state privacy rights

© 2024 Springer Nature Limited

xml version="1.0" encoding="UTF-8"?
